# Supplementary material
Source: publisher figshare collection journal article supplement (https://frontiersin.figshare.com/ndownloader/files/22331769)

**Fig. S1** Adult *Monetaria annulus* is often seen on the leaves of *Thalassia hemprichii* and sediment surface in seagrass bed in Li'an gang

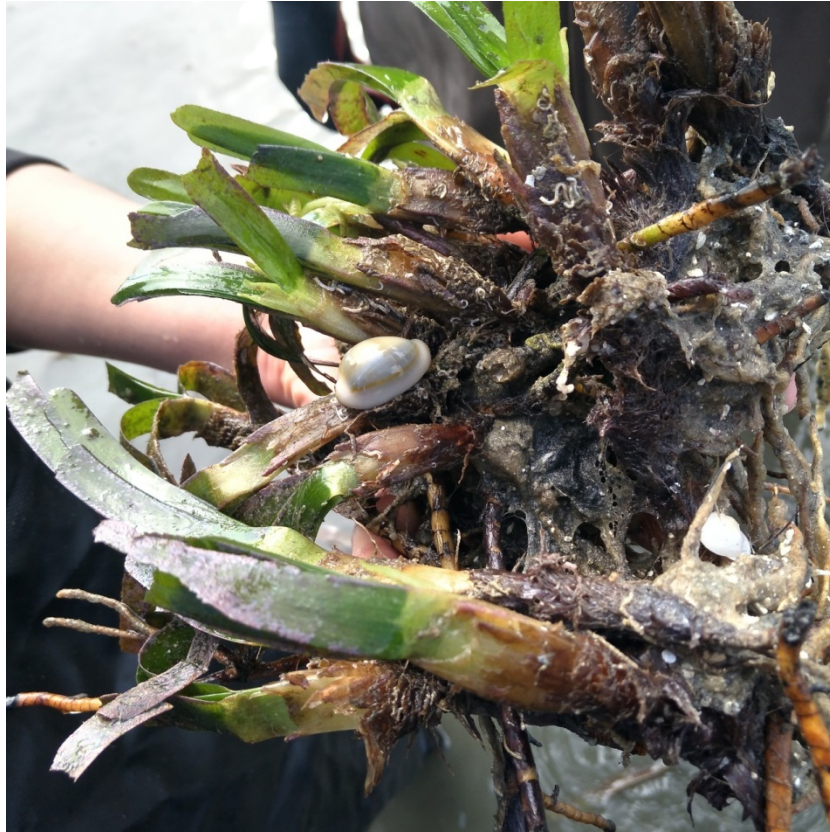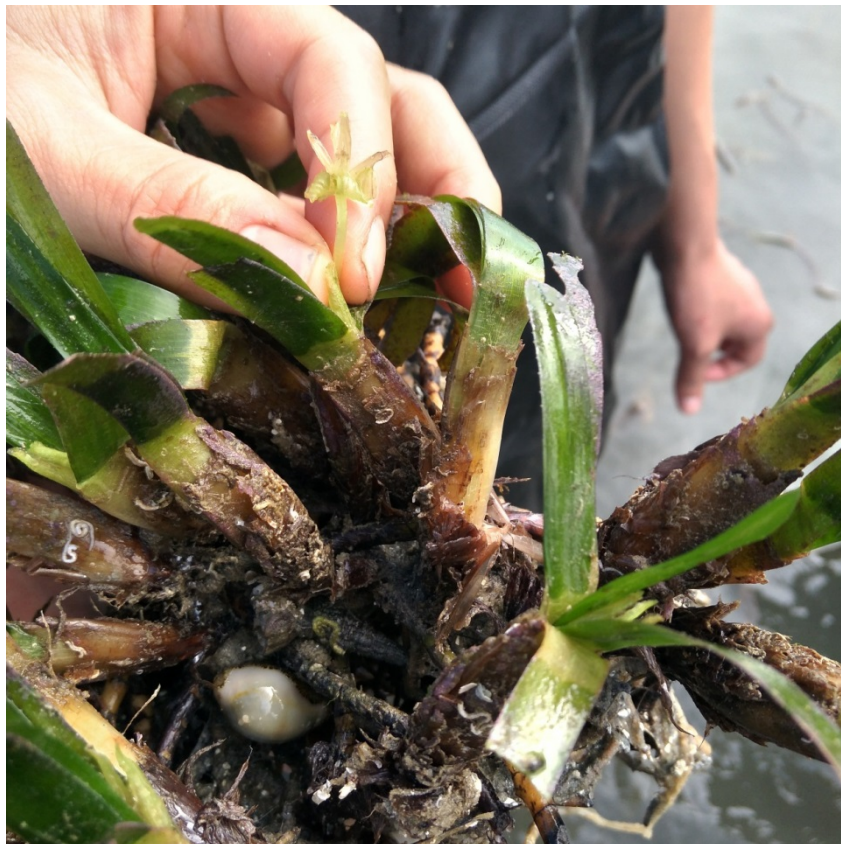

Supplement: Supplementary file 1 [file 22331769]
